# Supplementary material for: Differential genome-wide DNA methylation patterns in childhood obesity
Source: PubMed Central journal article supplement (PMC6434834; doi:10.1186/s13104-019-4189-0), 2019-03-25
Supplement: 13104_2019_4189_MOESM1_ESM.pdf [file 13104_2019_4189_MOESM1_ESM.pdf]

Table S1: 277 CpG sites (FDR<0.2) whose DNA methylation levels were significantly different between obese and non-obese group.

| ID         | UCSC_REFGENE_NAME | Mean_NonObese | SD Non-Obese | Mean_Obese | SD Obese | t     | df     | p.value | FDR    | Mean difference (obese-nonobese) | Cohen's d |
|------------|-------------------|---------------|--------------|------------|----------|-------|--------|---------|--------|----------------------------------|-----------|
| cg16507569 | COL11A2           | 0.840         | 0.164        | 0.515      | 0.012    | 9.972 | 26.332 | <0.001  | <0.001 | -0.324                           | 2.208     |
| cg27289463 |                   | 0.264         | 0.090        | 0.432      | 0.029    | 7.710 | 21.432 | <0.001  | 0.001  | 0.169                            | 2.061     |
| cg25013753 | ARHGAP22          | 0.465         | 0.318        | 0.035      | 0.013    | 6.877 | 25.396 | <0.001  | 0.001  | -0.430                           | 1.508     |
| cg19697575 |                   | 0.596         | 0.366        | 0.103      | 0.065    | 6.354 | 28.996 | <0.001  | 0.002  | -0.493                           | 1.494     |
| cg26935333 |                   | 0.397         | 0.075        | 0.293      | 0.020    | 6.023 | 24.897 | <0.001  | 0.007  | -0.104                           | 1.539     |
| cg14007688 | DBH               | 0.577         | 0.290        | 0.898      | 0.011    | 5.620 | 25.354 | <0.001  | 0.009  | 0.321                            | 1.232     |
| cg22459517 | EPS8L1            | 0.631         | 0.194        | 0.851      | 0.014    | 5.680 | 26.244 | <0.001  | 0.009  | 0.220                            | 1.257     |
| cg25813936 | GNE               | 0.793         | 0.081        | 0.886      | 0.012    | 5.523 | 28.621 | <0.001  | 0.009  | 0.093                            | 1.268     |
| cg00320354 | TSPAN5            | 0.758         | 0.178        | 0.963      | 0.027    | 5.538 | 28.730 | <0.001  | 0.009  | 0.204                            | 1.276     |
| cg08282428 | RBM46             | 0.680         | 0.070        | 0.580      | 0.022    | 5.897 | 21.332 | <0.001  | 0.009  | -0.100                           | 1.578     |
| cg10977910 | TTL7              | 0.387         | 0.137        | 0.143      | 0.057    | 6.584 | 14.768 | <0.001  | 0.011  | -0.244                           | 1.960     |
| cg27413643 | ANKRD27;RGS9BP    | 0.301         | 0.195        | 0.092      | 0.014    | 5.381 | 26.266 | <0.001  | 0.012  | -0.209                           | 1.191     |
| cg06549275 | ASAP2             | 0.638         | 0.067        | 0.723      | 0.019    | 5.441 | 24.041 | <0.001  | 0.012  | 0.085                            | 1.406     |
| cg26658743 |                   | 0.747         | 0.060        | 0.665      | 0.020    | 5.651 | 20.755 | <0.001  | 0.012  | -0.083                           | 1.524     |
| cg05248234 | FSCN2             | 0.505         | 0.372        | 0.114      | 0.037    | 5.228 | 27.163 | <0.001  | 0.013  | -0.391                           | 1.169     |
| cg00340052 | AGAP1             | 0.819         | 0.052        | 0.719      | 0.024    | 6.692 | 12.601 | <0.001  | 0.013  | -0.100                           | 2.099     |
| cg19181528 |                   | 0.732         | 0.142        | 0.891      | 0.032    | 5.066 | 27.809 | <0.001  | 0.017  | 0.159                            | 1.239     |
| cg01835922 |                   | 0.354         | 0.309        | 0.042      | 0.004    | 5.144 | 25.035 | <0.001  | 0.018  | -0.312                           | 1.124     |
| cg03877767 | GREB1             | 0.712         | 0.072        | 0.615      | 0.024    | 5.374 | 19.827 | <0.001  | 0.020  | -0.096                           | 1.468     |
| cg07248242 | TSPAN9            | 0.608         | 0.085        | 0.522      | 0.014    | 4.825 | 28.978 | <0.001  | 0.024  | -0.086                           | 1.126     |
| cg00152799 | TXNL1             | 0.353         | 0.065        | 0.251      | 0.027    | 5.749 | 14.814 | <0.001  | 0.024  | -0.102                           | 1.710     |
| cg06916011 | EPS8L1            | 0.297         | 0.062        | 0.361      | 0.012    | 4.803 | 28.884 | <0.001  | 0.025  | 0.064                            | 1.141     |

|            |           |       |       |       |       |       |        |        |       |        |       |
|------------|-----------|-------|-------|-------|-------|-------|--------|--------|-------|--------|-------|
| cg21158163 |           | 0.759 | 0.144 | 0.909 | 0.029 | 4.799 | 28.690 | <0.001 | 0.025 | 0.150  | 1.149 |
| cg21040096 | RPH3AL    | 0.781 | 0.150 | 0.931 | 0.027 | 4.715 | 28.985 | <0.001 | 0.027 | 0.150  | 1.111 |
| cg09949906 | HLA-DRB1  | 0.598 | 0.333 | 0.937 | 0.065 | 4.732 | 28.798 | <0.001 | 0.027 | 0.338  | 1.129 |
| cg14377951 | GSTM5     | 0.335 | 0.090 | 0.438 | 0.026 | 4.890 | 23.595 | <0.001 | 0.027 | 0.103  | 1.271 |
| cg01520956 | FAM47E    | 0.451 | 0.058 | 0.519 | 0.017 | 4.902 | 22.919 | <0.001 | 0.028 | 0.068  | 1.285 |
| cg23336892 |           | 0.421 | 0.214 | 0.214 | 0.032 | 4.662 | 28.697 | <0.001 | 0.028 | -0.207 | 1.073 |
| cg05808124 |           | 0.824 | 0.076 | 0.897 | 0.011 | 4.660 | 28.743 | <0.001 | 0.028 | 0.074  | 1.074 |
| cg10764750 |           | 0.630 | 0.115 | 0.771 | 0.038 | 4.952 | 20.259 | <0.001 | 0.031 | 0.141  | 1.345 |
| cg06508867 |           | 0.304 | 0.073 | 0.227 | 0.018 | 4.650 | 26.485 | <0.001 | 0.033 | -0.076 | 1.162 |
| cg26590106 | HLA-DRB1  | 0.574 | 0.347 | 0.240 | 0.063 | 4.522 | 28.978 | <0.001 | 0.036 | -0.334 | 1.067 |
| cg27112983 |           | 0.755 | 0.167 | 0.926 | 0.040 | 4.574 | 27.036 | <0.001 | 0.036 | 0.171  | 1.134 |
| cg20756026 | HEXDC     | 0.618 | 0.244 | 0.839 | 0.011 | 4.591 | 25.537 | <0.001 | 0.036 | 0.221  | 1.008 |
| cg07618759 | COL4A2    | 0.577 | 0.312 | 0.859 | 0.023 | 4.554 | 26.327 | <0.001 | 0.036 | 0.282  | 1.008 |
| cg06052372 |           | 0.649 | 0.302 | 0.923 | 0.011 | 4.608 | 25.362 | <0.001 | 0.036 | 0.274  | 1.010 |
| cg11317459 |           | 0.106 | 0.107 | 0.010 | 0.009 | 4.521 | 26.654 | <0.001 | 0.037 | -0.096 | 1.005 |
| cg11251367 | FMN2      | 0.327 | 0.334 | 0.029 | 0.009 | 4.531 | 25.179 | <0.001 | 0.038 | -0.298 | 0.991 |
| cg07437923 | DNAJA3    | 0.319 | 0.325 | 0.029 | 0.014 | 4.528 | 25.459 | <0.001 | 0.038 | -0.290 | 0.993 |
| cg05834845 | MUC4      | 0.702 | 0.193 | 0.885 | 0.038 | 4.418 | 28.821 | <0.001 | 0.039 | 0.183  | 1.053 |
| cg27362989 | HLA-DRB5  | 0.527 | 0.298 | 0.104 | 0.128 | 5.179 | 14.218 | <0.001 | 0.039 | -0.423 | 1.560 |
| cg23477460 |           | 0.168 | 0.062 | 0.108 | 0.014 | 4.367 | 27.908 | <0.001 | 0.045 | -0.060 | 1.066 |
| cg05545777 |           | 0.424 | 0.074 | 0.502 | 0.022 | 4.493 | 23.204 | <0.001 | 0.046 | 0.078  | 1.173 |
| cg15586842 | ANXA8L2   | 0.796 | 0.109 | 0.923 | 0.038 | 4.642 | 19.234 | <0.001 | 0.048 | 0.127  | 1.279 |
| cg12112110 | TNXB;TNXB | 0.590 | 0.066 | 0.505 | 0.026 | 4.832 | 15.803 | <0.001 | 0.051 | -0.085 | 1.409 |
| cg13752114 | MUC4      | 0.833 | 0.146 | 0.960 | 0.016 | 4.281 | 27.429 | <0.001 | 0.054 | 0.126  | 0.961 |
| cg04417708 | ZZEF1     | 0.758 | 0.200 | 0.928 | 0.010 | 4.318 | 25.632 | <0.001 | 0.054 | 0.170  | 0.949 |

|            |          |       |       |       |       |       |        |        |       |        |       |
|------------|----------|-------|-------|-------|-------|-------|--------|--------|-------|--------|-------|
| cg05276469 |          | 0.301 | 0.180 | 0.146 | 0.021 | 4.245 | 27.864 | <0.001 | 0.055 | -0.155 | 0.959 |
| cg23153338 | OR52I1   | 0.610 | 0.058 | 0.669 | 0.017 | 4.357 | 23.260 | <0.001 | 0.056 | 0.059  | 1.137 |
| cg12077433 | SCHIP1   | 0.660 | 0.264 | 0.884 | 0.020 | 4.250 | 26.313 | <0.001 | 0.057 | 0.223  | 0.941 |
| cg17876294 |          | 0.539 | 0.157 | 0.406 | 0.012 | 4.249 | 26.443 | <0.001 | 0.057 | -0.133 | 0.942 |
| cg01943931 |          | 0.581 | 0.284 | 0.824 | 0.033 | 4.209 | 27.755 | <0.001 | 0.057 | 0.243  | 0.950 |
| cg07099606 |          | 0.850 | 0.124 | 0.953 | 0.007 | 4.215 | 25.848 | <0.001 | 0.057 | 0.103  | 0.928 |
| cg05130642 | EPPK1    | 0.547 | 0.371 | 0.857 | 0.024 | 4.226 | 25.998 | <0.001 | 0.057 | 0.311  | 0.932 |
| cg02132667 |          | 0.474 | 0.072 | 0.413 | 0.009 | 4.164 | 27.919 | <0.001 | 0.057 | -0.061 | 0.942 |
| cg15602423 | HLA-DRB1 | 0.552 | 0.328 | 0.835 | 0.052 | 4.143 | 28.900 | <0.001 | 0.057 | 0.283  | 0.961 |
| cg12733396 | COL9A2   | 0.788 | 0.083 | 0.860 | 0.014 | 4.138 | 28.978 | <0.001 | 0.057 | 0.072  | 0.966 |
| cg04422742 | HLA-DRB6 | 0.528 | 0.250 | 0.307 | 0.046 | 4.149 | 28.970 | <0.001 | 0.057 | -0.221 | 0.979 |
| cg10434728 | IQGAP1   | 0.686 | 0.062 | 0.630 | 0.013 | 4.175 | 28.420 | <0.001 | 0.057 | -0.056 | 1.008 |
| cg24629711 | MUSTN1   | 0.736 | 0.210 | 0.910 | 0.014 | 4.179 | 26.136 | <0.001 | 0.058 | 0.174  | 0.923 |
| cg10204320 | MTMR9L   | 0.506 | 0.066 | 0.564 | 0.013 | 4.122 | 28.850 | <0.001 | 0.058 | 0.058  | 0.981 |
| cg04222842 | SRP9     | 0.150 | 0.057 | 0.099 | 0.013 | 4.130 | 27.952 | <0.001 | 0.059 | -0.052 | 1.007 |
| cg11404906 | HLA-DRB1 | 0.632 | 0.346 | 0.934 | 0.064 | 4.100 | 28.969 | <0.001 | 0.059 | 0.302  | 0.968 |
| cg18111114 | HLA-DRB5 | 0.165 | 0.192 | 0.007 | 0.010 | 4.162 | 25.668 | <0.001 | 0.060 | -0.158 | 0.915 |
| cg21792493 |          | 0.484 | 0.273 | 0.263 | 0.010 | 4.112 | 25.359 | <0.001 | 0.061 | -0.221 | 0.901 |
| cg00861214 | CRIL     | 0.596 | 0.262 | 0.809 | 0.014 | 4.116 | 25.695 | <0.001 | 0.061 | 0.213  | 0.905 |
| cg10306192 | MMP27    | 0.272 | 0.321 | 0.010 | 0.009 | 4.138 | 25.213 | <0.001 | 0.061 | -0.261 | 0.906 |
| cg18578876 | GPR109B  | 0.768 | 0.134 | 0.878 | 0.014 | 4.078 | 27.283 | <0.001 | 0.061 | 0.110  | 0.914 |
| cg01736133 |          | 0.660 | 0.086 | 0.732 | 0.012 | 4.080 | 28.551 | <0.001 | 0.061 | 0.073  | 0.935 |
| cg18918831 | MUC4     | 0.683 | 0.165 | 0.842 | 0.046 | 4.136 | 24.331 | <0.001 | 0.061 | 0.159  | 1.065 |
| cg22984586 | CCR5     | 0.350 | 0.199 | 0.551 | 0.062 | 4.205 | 21.975 | <0.001 | 0.061 | 0.201  | 1.116 |
| cg17715141 |          | 0.623 | 0.077 | 0.541 | 0.026 | 4.289 | 20.044 | <0.001 | 0.061 | -0.082 | 1.168 |
| cg07839457 | NLRC5    | 0.434 | 0.073 | 0.353 | 0.026 | 4.396 | 18.065 | <0.001 | 0.061 | -0.081 | 1.233 |

|            |           |       |       |       |       |       |        |        |       |        |       |
|------------|-----------|-------|-------|-------|-------|-------|--------|--------|-------|--------|-------|
| cg06711418 | MT2A      | 0.287 | 0.178 | 0.142 | 0.017 | 4.046 | 26.958 | <0.001 | 0.065 | -0.145 | 0.903 |
| cg07741840 | KDM2B     | 0.608 | 0.290 | 0.841 | 0.016 | 4.054 | 25.763 | <0.001 | 0.066 | 0.232  | 0.892 |
| cg19491478 |           | 0.666 | 0.072 | 0.749 | 0.028 | 4.402 | 16.665 | <0.001 | 0.066 | 0.082  | 1.264 |
| cg13905298 |           | 0.756 | 0.227 | 0.937 | 0.008 | 4.048 | 25.346 | <0.001 | 0.068 | 0.181  | 0.887 |
| cg19353052 | DTX1      | 0.696 | 0.257 | 0.901 | 0.014 | 4.033 | 25.749 | <0.001 | 0.068 | 0.205  | 0.887 |
| cg11466708 | C22orf43  | 0.685 | 0.211 | 0.855 | 0.022 | 3.995 | 27.319 | <0.001 | 0.068 | 0.170  | 0.895 |
| cg24340935 |           | 0.369 | 0.058 | 0.304 | 0.022 | 4.346 | 16.982 | <0.001 | 0.068 | -0.065 | 1.241 |
| cg10632894 | HLA-DRB1  | 0.744 | 0.256 | 0.946 | 0.013 | 4.005 | 25.608 | <0.001 | 0.071 | 0.203  | 0.880 |
| cg25550823 |           | 0.753 | 0.235 | 0.938 | 0.006 | 4.003 | 25.155 | <0.001 | 0.072 | 0.185  | 0.876 |
| cg01414268 |           | 0.259 | 0.134 | 0.141 | 0.031 | 3.957 | 27.473 | <0.001 | 0.072 | -0.118 | 0.974 |
| cg22627029 | HLA-DRB6  | 0.304 | 0.333 | 0.042 | 0.020 | 3.965 | 25.892 | 0.001  | 0.073 | -0.261 | 0.874 |
| cg13910785 | HLA-DRB1  | 0.350 | 0.422 | 0.018 | 0.020 | 3.984 | 25.576 | <0.001 | 0.073 | -0.332 | 0.875 |
| cg17745575 | FAM106A   | 0.608 | 0.233 | 0.793 | 0.027 | 3.903 | 27.764 | 0.001  | 0.073 | 0.184  | 0.881 |
| cg24233293 |           | 0.672 | 0.123 | 0.770 | 0.015 | 3.910 | 27.991 | 0.001  | 0.073 | 0.098  | 0.886 |
| cg05653481 | LOC645332 | 0.740 | 0.120 | 0.836 | 0.016 | 3.917 | 28.259 | 0.001  | 0.073 | 0.096  | 0.892 |
| cg13522370 |           | 0.514 | 0.322 | 0.772 | 0.048 | 3.879 | 28.716 | 0.001  | 0.073 | 0.259  | 0.893 |
| cg12890750 | VTRNA1-2  | 0.474 | 0.164 | 0.606 | 0.025 | 3.895 | 28.777 | 0.001  | 0.073 | 0.132  | 0.899 |
| cg15251140 |           | 0.586 | 0.332 | 0.855 | 0.049 | 3.905 | 28.698 | 0.001  | 0.073 | 0.269  | 0.899 |
| cg01310397 | MUC4      | 0.800 | 0.097 | 0.879 | 0.016 | 3.886 | 28.914 | 0.001  | 0.073 | 0.079  | 0.902 |
| cg19218082 | COL4A2    | 0.673 | 0.280 | 0.902 | 0.049 | 3.870 | 29.000 | 0.001  | 0.073 | 0.229  | 0.908 |
| cg17479576 | FAM160A1  | 0.829 | 0.138 | 0.956 | 0.037 | 3.980 | 25.103 | 0.001  | 0.073 | 0.127  | 1.014 |
| cg12252547 | MAL2      | 0.426 | 0.181 | 0.593 | 0.051 | 3.969 | 24.073 | 0.001  | 0.073 | 0.167  | 1.025 |
| cg14785464 | HLCS      | 0.490 | 0.087 | 0.374 | 0.041 | 4.623 | 12.269 | 0.001  | 0.073 | -0.116 | 1.463 |
| cg07415359 | LDHC      | 0.819 | 0.071 | 0.875 | 0.009 | 3.857 | 28.272 | 0.001  | 0.076 | 0.056  | 0.878 |

|            |               |       |       |       |       |       |        |       |       |        |       |
|------------|---------------|-------|-------|-------|-------|-------|--------|-------|-------|--------|-------|
| cg26036029 | HLA-DRB1      | 0.848 | 0.101 | 0.929 | 0.016 | 3.851 | 28.898 | 0.001 | 0.076 | 0.081  | 0.893 |
| cg09399716 |               | 0.610 | 0.167 | 0.748 | 0.033 | 3.846 | 28.797 | 0.001 | 0.076 | 0.138  | 0.917 |
| cg23490161 | SDHA;CCDC127  | 0.126 | 0.150 | 0.011 | 0.002 | 3.905 | 25.069 | 0.001 | 0.076 | -0.115 | 0.853 |
| cg12109260 |               | 0.901 | 0.058 | 0.781 | 0.041 | 5.578 | 7.579  | 0.001 | 0.076 | -0.120 | 2.208 |
| cg08950364 |               | 0.643 | 0.216 | 0.810 | 0.022 | 3.856 | 27.192 | 0.001 | 0.076 | 0.168  | 0.863 |
| cg13275603 | ENC1          | 0.276 | 0.080 | 0.358 | 0.028 | 4.061 | 18.738 | 0.001 | 0.080 | 0.082  | 1.127 |
| cg13176198 |               | 0.851 | 0.079 | 0.749 | 0.037 | 4.506 | 12.295 | 0.001 | 0.080 | -0.102 | 1.425 |
| cg13554818 | PHLDB3        | 0.602 | 0.081 | 0.674 | 0.021 | 3.856 | 25.615 | 0.001 | 0.080 | 0.072  | 0.976 |
| cg27057480 | ARHGAP22      | 0.343 | 0.212 | 0.148 | 0.062 | 3.907 | 23.264 | 0.001 | 0.080 | -0.196 | 1.020 |
| cg05308244 | RIMBP2        | 0.643 | 0.321 | 0.886 | 0.017 | 3.839 | 25.714 | 0.001 | 0.081 | 0.243  | 0.844 |
| cg13017022 | ZMAT2         | 0.709 | 0.301 | 0.941 | 0.034 | 3.806 | 27.666 | 0.001 | 0.081 | 0.232  | 0.857 |
| cg16095660 | PGAP2         | 0.840 | 0.083 | 0.908 | 0.017 | 3.792 | 28.555 | 0.001 | 0.081 | 0.068  | 0.912 |
| cg24960960 | SDHAP3        | 0.121 | 0.149 | 0.008 | 0.006 | 3.839 | 25.376 | 0.001 | 0.081 | -0.113 | 0.841 |
| cg25210835 | GSTM5         | 0.300 | 0.160 | 0.482 | 0.066 | 4.227 | 15.026 | 0.001 | 0.081 | 0.182  | 1.251 |
| cg07582993 | UBOX5;FASTKD5 | 0.524 | 0.082 | 0.448 | 0.024 | 3.892 | 22.859 | 0.001 | 0.081 | -0.076 | 1.021 |
| cg22999099 | BOK           | 0.906 | 0.100 | 0.984 | 0.014 | 3.763 | 28.606 | 0.001 | 0.083 | 0.078  | 0.863 |
| cg06627617 | ASAP2         | 0.498 | 0.116 | 0.631 | 0.049 | 4.228 | 14.649 | 0.001 | 0.083 | 0.133  | 1.262 |
| cg04335714 |               | 0.471 | 0.065 | 0.523 | 0.012 | 3.748 | 28.937 | 0.001 | 0.084 | 0.052  | 0.887 |
| cg27378537 | SDHAP3        | 0.152 | 0.120 | 0.062 | 0.005 | 3.802 | 25.500 | 0.001 | 0.084 | -0.090 | 0.835 |
| cg14398295 |               | 0.658 | 0.089 | 0.560 | 0.036 | 4.129 | 15.712 | 0.001 | 0.085 | -0.098 | 1.206 |
| cg21167402 | SDHAP3        | 0.170 | 0.165 | 0.044 | 0.021 | 3.746 | 28.095 | 0.001 | 0.085 | -0.126 | 0.850 |
| cg14317230 | MTDH          | 0.932 | 0.056 | 0.991 | 0.021 | 4.037 | 17.201 | 0.001 | 0.085 | 0.059  | 1.148 |
| cg09858108 |               | 0.437 | 0.106 | 0.294 | 0.054 | 4.526 | 11.151 | 0.001 | 0.085 | -0.144 | 1.484 |
| cg08422420 | SDHAP3        | 0.133 | 0.170 | 0.006 | 0.003 | 3.781 | 25.056 | 0.001 | 0.086 | -0.126 | 0.826 |
| cg15048554 | BTBD11        | 0.225 | 0.256 | 0.035 | 0.017 | 3.763 | 26.080 | 0.001 | 0.086 | -0.191 | 0.831 |
| cg10395519 | MTHFD1L       | 0.830 | 0.059 | 0.889 | 0.021 | 3.962 | 18.637 | 0.001 | 0.086 | 0.059  | 1.101 |

|            |          |       |       |       |       |       |        |       |       |        |       |
|------------|----------|-------|-------|-------|-------|-------|--------|-------|-------|--------|-------|
| cg21931717 | SDHAP3   | 0.089 | 0.118 | 0.001 | 0.002 | 3.773 | 25.106 | 0.001 | 0.086 | -0.087 | 0.825 |
| cg24875593 | PDXK     | 0.891 | 0.094 | 0.962 | 0.010 | 3.732 | 27.510 | 0.001 | 0.086 | 0.071  | 0.839 |
| cg17369694 | HLA-DRB5 | 0.304 | 0.363 | 0.037 | 0.019 | 3.739 | 25.672 | 0.001 | 0.086 | -0.268 | 0.822 |
| cg08578320 | HLA-DRB1 | 0.680 | 0.297 | 0.902 | 0.030 | 3.717 | 27.216 | 0.001 | 0.086 | 0.222  | 0.832 |
| cg06488536 |          | 0.530 | 0.063 | 0.482 | 0.011 | 3.689 | 28.999 | 0.001 | 0.086 | -0.049 | 0.865 |
| cg06085042 | MIR570   | 0.719 | 0.168 | 0.854 | 0.035 | 3.705 | 28.543 | 0.001 | 0.086 | 0.135  | 0.891 |
| cg07341007 | MUC4     | 0.699 | 0.126 | 0.803 | 0.029 | 3.706 | 27.670 | 0.001 | 0.086 | 0.104  | 0.909 |
| cg11274172 | UVRAG    | 0.620 | 0.065 | 0.677 | 0.018 | 3.776 | 24.298 | 0.001 | 0.086 | 0.057  | 0.972 |
| cg09476440 | KIAA1324 | 0.796 | 0.139 | 0.942 | 0.054 | 4.023 | 16.557 | 0.001 | 0.086 | 0.146  | 1.157 |
| cg26839410 | NTM      | 0.792 | 0.187 | 0.930 | 0.014 | 3.720 | 26.313 | 0.001 | 0.087 | 0.138  | 0.824 |
| cg26472636 | SDHAP3   | 0.198 | 0.169 | 0.072 | 0.017 | 3.705 | 27.269 | 0.001 | 0.087 | -0.126 | 0.830 |
| cg08778598 | SDHAP3   | 0.158 | 0.200 | 0.013 | 0.005 | 3.701 | 25.193 | 0.001 | 0.091 | -0.145 | 0.810 |
| cg15706692 |          | 0.170 | 0.198 | 0.026 | 0.006 | 3.701 | 25.218 | 0.001 | 0.091 | -0.144 | 0.810 |
| cg02305164 | ATP8B3   | 0.756 | 0.232 | 0.925 | 0.008 | 3.711 | 25.301 | 0.001 | 0.091 | 0.169  | 0.813 |
| cg03398919 |          | 0.655 | 0.263 | 0.847 | 0.016 | 3.690 | 25.911 | 0.001 | 0.091 | 0.192  | 0.813 |
| cg07093060 |          | 0.740 | 0.212 | 0.577 | 0.036 | 3.651 | 28.970 | 0.001 | 0.091 | -0.163 | 0.851 |
| cg01099512 | CTSG     | 0.254 | 0.059 | 0.301 | 0.012 | 3.650 | 28.644 | 0.001 | 0.091 | 0.047  | 0.875 |
| cg17646820 |          | 0.248 | 0.062 | 0.194 | 0.018 | 3.736 | 23.869 | 0.001 | 0.091 | -0.054 | 0.967 |
| cg21805179 | MPHOSPH9 | 0.254 | 0.088 | 0.176 | 0.026 | 3.754 | 22.919 | 0.001 | 0.091 | -0.078 | 0.984 |
| cg19466822 | BCL11B   | 0.539 | 0.105 | 0.447 | 0.031 | 3.725 | 23.425 | 0.001 | 0.093 | -0.092 | 0.970 |
| cg06721546 | SDHAP3   | 0.142 | 0.111 | 0.061 | 0.007 | 3.672 | 25.921 | 0.001 | 0.093 | -0.081 | 0.810 |
| cg25140213 | HLA-DRB6 | 0.442 | 0.313 | 0.206 | 0.048 | 3.626 | 28.797 | 0.001 | 0.093 | -0.236 | 0.837 |
| cg23914255 | AACS     | 0.750 | 0.210 | 0.906 | 0.027 | 3.619 | 28.229 | 0.001 | 0.094 | 0.155  | 0.823 |
| cg19774683 | HLA-DRB6 | 0.357 | 0.419 | 0.046 | 0.055 | 3.624 | 28.244 | 0.001 | 0.094 | -0.311 | 0.825 |
| cg23643375 | SP6      | 0.734 | 0.158 | 0.860 | 0.034 | 3.624 | 28.172 | 0.001 | 0.094 | 0.126  | 0.880 |
| cg26299084 | PRDM8    | 0.324 | 0.081 | 0.230 | 0.036 | 4.115 | 13.444 | 0.001 | 0.094 | -0.093 | 1.262 |
| cg00819048 |          | 0.762 | 0.220 | 0.920 | 0.011 | 3.652 | 25.618 | 0.001 | 0.095 | 0.159  | 0.802 |

|            |            |       |       |       |       |       |        |       |       |        |       |
|------------|------------|-------|-------|-------|-------|-------|--------|-------|-------|--------|-------|
| cg02423105 | CDH26      | 0.189 | 0.080 | 0.102 | 0.034 | 3.991 | 14.705 | 0.001 | 0.099 | -0.087 | 1.190 |
| cg01010328 | TTC24      | 0.310 | 0.069 | 0.388 | 0.030 | 4.043 | 13.955 | 0.001 | 0.099 | 0.077  | 1.225 |
| cg27283514 |            | 0.748 | 0.056 | 0.659 | 0.035 | 4.688 | 8.731  | 0.001 | 0.099 | -0.089 | 1.713 |
| cg07100532 | ENOSF1     | 0.853 | 0.089 | 0.715 | 0.054 | 4.651 | 8.844  | 0.001 | 0.100 | -0.139 | 1.689 |
| cg04996388 | MYADML2    | 0.880 | 0.117 | 0.965 | 0.012 | 3.582 | 27.404 | 0.001 | 0.102 | 0.085  | 0.804 |
| cg23667563 |            | 0.799 | 0.195 | 0.942 | 0.026 | 3.570 | 28.326 | 0.001 | 0.102 | 0.143  | 0.814 |
| cg27149073 | SDHAP3     | 0.191 | 0.164 | 0.074 | 0.010 | 3.599 | 25.941 | 0.001 | 0.102 | -0.117 | 0.793 |
| cg16854281 |            | 0.615 | 0.158 | 0.735 | 0.028 | 3.554 | 28.993 | 0.001 | 0.102 | 0.119  | 0.836 |
| cg05531409 | CPNE4      | 0.713 | 0.249 | 0.890 | 0.016 | 3.581 | 25.995 | 0.001 | 0.106 | 0.177  | 0.790 |
| cg03987818 |            | 0.747 | 0.265 | 0.935 | 0.017 | 3.571 | 26.048 | 0.001 | 0.108 | 0.188  | 0.788 |
| cg17626301 | TAP1       | 0.418 | 0.094 | 0.337 | 0.028 | 3.638 | 22.469 | 0.001 | 0.108 | -0.081 | 0.959 |
| cg12434901 | KCNH6      | 0.632 | 0.323 | 0.860 | 0.018 | 3.559 | 25.788 | 0.001 | 0.111 | 0.227  | 0.783 |
| cg09139047 | HLA-DRB1   | 0.683 | 0.349 | 0.930 | 0.026 | 3.552 | 26.316 | 0.001 | 0.111 | 0.247  | 0.786 |
| cg19961153 | ALPPL2     | 0.437 | 0.301 | 0.648 | 0.010 | 3.563 | 25.307 | 0.001 | 0.111 | 0.211  | 0.780 |
| cg01341801 | HLA-DRB5   | 0.301 | 0.375 | 0.038 | 0.024 | 3.538 | 26.005 | 0.002 | 0.114 | -0.263 | 0.781 |
| cg14210114 | IGSF8      | 0.875 | 0.099 | 0.945 | 0.007 | 3.507 | 26.356 | 0.002 | 0.120 | 0.069  | 0.777 |
| cg05237260 |            | 0.370 | 0.103 | 0.482 | 0.045 | 3.908 | 13.672 | 0.002 | 0.120 | 0.112  | 1.192 |
| cg19409579 | PRDM8      | 0.341 | 0.103 | 0.195 | 0.060 | 4.366 | 9.384  | 0.002 | 0.120 | -0.146 | 1.540 |
| cg12639429 | TTC39C     | 0.581 | 0.070 | 0.514 | 0.026 | 3.706 | 17.527 | 0.002 | 0.121 | -0.067 | 1.048 |
| cg24913825 |            | 0.452 | 0.080 | 0.371 | 0.033 | 3.800 | 15.392 | 0.002 | 0.121 | -0.082 | 1.117 |
| cg20052865 | SNORD114-1 | 0.700 | 0.052 | 0.631 | 0.028 | 4.230 | 10.132 | 0.002 | 0.122 | -0.069 | 1.442 |
| cg10187601 | ST7        | 0.805 | 0.143 | 0.913 | 0.031 | 3.460 | 28.070 | 0.002 | 0.124 | 0.108  | 0.842 |
| cg16034541 | MUC4       | 0.634 | 0.197 | 0.789 | 0.050 | 3.482 | 26.330 | 0.002 | 0.124 | 0.155  | 0.872 |
| cg16819848 | ZFYVE28    | 0.451 | 0.259 | 0.231 | 0.080 | 3.549 | 22.084 | 0.002 | 0.126 | -0.220 | 0.940 |
| cg01033205 |            | 0.808 | 0.186 | 0.935 | 0.012 | 3.465 | 26.027 | 0.002 | 0.130 | 0.128  | 0.765 |
| cg13202221 | TM2D3      | 0.467 | 0.052 | 0.403 | 0.027 | 4.068 | 10.972 | 0.002 | 0.130 | -0.064 | 1.342 |

|            |              |       |       |       |       |       |        |       |       |        |       |
|------------|--------------|-------|-------|-------|-------|-------|--------|-------|-------|--------|-------|
| cg09858862 | ID3          | 0.751 | 0.083 | 0.811 | 0.014 | 3.420 | 28.983 | 0.002 | 0.130 | 0.060  | 0.799 |
| cg14408831 |              | 0.713 | 0.297 | 0.915 | 0.010 | 3.462 | 25.309 | 0.002 | 0.131 | 0.202  | 0.758 |
| cg08914678 | PDIA2        | 0.596 | 0.258 | 0.774 | 0.026 | 3.434 | 27.302 | 0.002 | 0.131 | 0.178  | 0.770 |
| cg00138041 | PRDM8        | 0.698 | 0.080 | 0.587 | 0.047 | 4.281 | 9.277  | 0.002 | 0.131 | -0.112 | 1.519 |
| cg01882774 | OTUB2        | 0.797 | 0.134 | 0.891 | 0.018 | 3.417 | 28.300 | 0.002 | 0.131 | 0.094  | 0.778 |
| cg22961278 | PRDM8        | 0.366 | 0.089 | 0.276 | 0.037 | 3.746 | 14.984 | 0.002 | 0.131 | -0.090 | 1.110 |
| cg01124477 |              | 0.757 | 0.060 | 0.689 | 0.029 | 3.937 | 12.106 | 0.002 | 0.131 | -0.068 | 1.252 |
| cg08241318 |              | 0.602 | 0.059 | 0.647 | 0.014 | 3.415 | 27.501 | 0.002 | 0.133 | 0.045  | 0.840 |
| cg03605463 |              | 0.884 | 0.094 | 0.968 | 0.032 | 3.559 | 19.574 | 0.002 | 0.134 | 0.083  | 0.976 |
| cg03372334 | MBNL2        | 0.692 | 0.324 | 0.913 | 0.027 | 3.418 | 26.607 | 0.002 | 0.134 | 0.221  | 0.759 |
| cg26969150 | POTEA        | 0.777 | 0.153 | 0.881 | 0.013 | 3.418 | 26.716 | 0.002 | 0.134 | 0.104  | 0.760 |
| cg02276823 | MMD2         | 0.507 | 0.087 | 0.435 | 0.026 | 3.476 | 22.549 | 0.002 | 0.136 | -0.072 | 0.915 |
| cg18713687 | MUC4         | 0.846 | 0.083 | 0.912 | 0.022 | 3.426 | 25.055 | 0.002 | 0.137 | 0.066  | 0.873 |
| cg23489137 | RBMS1        | 0.699 | 0.114 | 0.600 | 0.038 | 3.524 | 20.258 | 0.002 | 0.137 | -0.099 | 0.957 |
| cg14199961 |              | 0.289 | 0.057 | 0.170 | 0.048 | 4.938 | 6.450  | 0.002 | 0.137 | -0.119 | 2.195 |
| cg20741528 | CCDC127;SDHA | 0.103 | 0.076 | 0.052 | 0.004 | 3.411 | 25.597 | 0.002 | 0.137 | -0.051 | 0.749 |
| cg03224005 |              | 0.706 | 0.273 | 0.890 | 0.017 | 3.403 | 25.949 | 0.002 | 0.137 | 0.184  | 0.750 |
| cg13633881 | ADAMTS13     | 0.768 | 0.183 | 0.894 | 0.021 | 3.386 | 27.660 | 0.002 | 0.137 | 0.126  | 0.763 |
| cg01517384 | HLA-B        | 0.394 | 0.070 | 0.314 | 0.034 | 3.918 | 11.626 | 0.002 | 0.137 | -0.081 | 1.265 |
| cg12420107 | VTRNA1-1     | 0.344 | 0.123 | 0.432 | 0.023 | 3.358 | 28.950 | 0.002 | 0.139 | 0.088  | 0.794 |
| cg03721887 | CTDP1        | 0.668 | 0.361 | 0.908 | 0.010 | 3.397 | 25.217 | 0.002 | 0.139 | 0.241  | 0.743 |
| cg00247094 | TBC1D16      | 0.745 | 0.214 | 0.890 | 0.020 | 3.376 | 26.990 | 0.002 | 0.139 | 0.145  | 0.754 |
| cg03226114 |              | 0.512 | 0.077 | 0.439 | 0.030 | 3.615 | 16.316 | 0.002 | 0.139 | -0.073 | 1.044 |
| cg02157827 | FLOT1;IER3   | 0.212 | 0.103 | 0.324 | 0.047 | 3.791 | 12.977 | 0.002 | 0.139 | 0.111  | 1.177 |
| cg05865327 | PPP2R5C      | 0.763 | 0.189 | 0.889 | 0.014 | 3.369 | 26.263 | 0.002 | 0.140 | 0.126  | 0.745 |



|            |           |       |       |       |       |       |        |       |       |        |       |
|------------|-----------|-------|-------|-------|-------|-------|--------|-------|-------|--------|-------|
| cg04173211 | IL16      | 0.871 | 0.123 | 0.953 | 0.011 | 3.359 | 26.753 | 0.002 | 0.140 | 0.083  | 0.747 |
| cg08912652 | SNX19     | 0.831 | 0.211 | 0.973 | 0.018 | 3.366 | 26.689 | 0.002 | 0.140 | 0.142  | 0.749 |
| cg24450063 | SLC25A44  | 0.250 | 0.121 | 0.334 | 0.017 | 3.341 | 28.614 | 0.002 | 0.140 | 0.083  | 0.767 |
| cg19596870 | SERPINB6  | 0.661 | 0.298 | 0.868 | 0.047 | 3.334 | 28.865 | 0.002 | 0.140 | 0.207  | 0.772 |
| cg12333160 |           | 0.148 | 0.096 | 0.079 | 0.020 | 3.341 | 28.343 | 0.002 | 0.140 | -0.070 | 0.808 |
| cg01446217 | ERMP1     | 0.287 | 0.066 | 0.346 | 0.024 | 3.538 | 18.146 | 0.002 | 0.140 | 0.059  | 0.991 |
| cg04227007 | LOC284412 | 0.749 | 0.195 | 0.884 | 0.029 | 3.332 | 28.688 | 0.002 | 0.141 | 0.135  | 0.766 |
| cg09834503 |           | 0.531 | 0.069 | 0.474 | 0.022 | 3.445 | 21.190 | 0.002 | 0.141 | -0.058 | 0.924 |
| cg19290738 | AP3D1     | 0.346 | 0.087 | 0.248 | 0.042 | 3.832 | 11.959 | 0.002 | 0.141 | -0.098 | 1.224 |
| cg08474748 |           | 0.499 | 0.082 | 0.403 | 0.042 | 3.891 | 11.168 | 0.002 | 0.142 | -0.096 | 1.275 |
| cg11861387 | PPYR1     | 0.268 | 0.234 | 0.112 | 0.019 | 3.345 | 26.510 | 0.002 | 0.143 | -0.156 | 0.742 |
| cg24824686 | PTPRE     | 0.713 | 0.066 | 0.766 | 0.020 | 3.402 | 22.675 | 0.002 | 0.143 | 0.053  | 0.894 |
| cg09885502 | GNAS      | 0.553 | 0.292 | 0.127 | 0.185 | 4.242 | 8.434  | 0.003 | 0.144 | -0.426 | 1.579 |
| cg04995300 |           | 0.248 | 0.068 | 0.196 | 0.018 | 3.351 | 24.978 | 0.003 | 0.147 | -0.052 | 0.855 |
| cg10983013 |           | 0.778 | 0.155 | 0.889 | 0.032 | 3.302 | 28.490 | 0.003 | 0.147 | 0.111  | 0.796 |
| cg14293674 |           | 0.769 | 0.215 | 0.911 | 0.012 | 3.330 | 25.775 | 0.003 | 0.149 | 0.142  | 0.733 |
| cg22676075 |           | 0.579 | 0.123 | 0.498 | 0.011 | 3.298 | 26.937 | 0.003 | 0.154 | -0.081 | 0.736 |
| cg25010115 | MYADML2   | 0.896 | 0.080 | 0.950 | 0.012 | 3.275 | 28.649 | 0.003 | 0.154 | 0.054  | 0.753 |
| cg05524354 | PTPRE     | 0.641 | 0.084 | 0.714 | 0.030 | 3.443 | 18.899 | 0.003 | 0.154 | 0.073  | 0.953 |
| cg03847896 |           | 0.585 | 0.149 | 0.771 | 0.082 | 3.950 | 9.964  | 0.003 | 0.154 | 0.185  | 1.356 |
| cg01760090 |           | 0.574 | 0.101 | 0.465 | 0.048 | 3.731 | 12.211 | 0.003 | 0.154 | -0.109 | 1.183 |
| cg10648815 | LAIR2     | 0.564 | 0.079 | 0.629 | 0.025 | 3.363 | 21.878 | 0.003 | 0.156 | 0.064  | 0.894 |
| cg11881038 | OPRM1     | 0.712 | 0.229 | 0.861 | 0.012 | 3.300 | 25.644 | 0.003 | 0.156 | 0.149  | 0.725 |
| cg17763566 | HLA-DPB2  | 0.765 | 0.184 | 0.885 | 0.011 | 3.295 | 25.906 | 0.003 | 0.156 | 0.120  | 0.726 |
| cg10601372 | WDR18     | 0.903 | 0.132 | 0.989 | 0.009 | 3.287 | 26.074 | 0.003 | 0.156 | 0.086  | 0.726 |

|            |                   |       |       |       |       |       |        |       |       |        |       |
|------------|-------------------|-------|-------|-------|-------|-------|--------|-------|-------|--------|-------|
| cg13318793 | HLA-DRB5          | 0.875 | 0.095 | 0.947 | 0.026 | 3.305 | 24.844 | 0.003 | 0.156 | 0.073  | 0.845 |
| cg04235768 | PRDM8             | 0.238 | 0.065 | 0.143 | 0.042 | 4.206 | 8.117  | 0.003 | 0.156 | -0.096 | 1.599 |
| cg08861434 |                   | 0.772 | 0.222 | 0.923 | 0.034 | 3.253 | 28.818 | 0.003 | 0.156 | 0.150  | 0.752 |
| cg03623097 | ARMS2             | 0.548 | 0.081 | 0.641 | 0.042 | 3.799 | 11.029 | 0.003 | 0.157 | 0.093  | 1.251 |
| cg20735041 | MUSTN1            | 0.812 | 0.087 | 0.755 | 0.009 | 3.264 | 27.181 | 0.003 | 0.157 | -0.057 | 0.730 |
| cg08564027 |                   | 0.913 | 0.082 | 0.808 | 0.047 | 3.972 | 9.416  | 0.003 | 0.157 | -0.105 | 1.399 |
| cg11187245 | HLA-B             | 0.599 | 0.067 | 0.540 | 0.025 | 3.436 | 17.582 | 0.003 | 0.160 | -0.059 | 0.971 |
| cg07684647 |                   | 0.679 | 0.351 | 0.904 | 0.006 | 3.272 | 25.065 | 0.003 | 0.163 | 0.225  | 0.715 |
| cg27041096 | COLEC10           | 0.667 | 0.071 | 0.597 | 0.031 | 3.571 | 13.838 | 0.003 | 0.163 | -0.070 | 1.085 |
| cg11265839 | ELK3              | 0.707 | 0.075 | 0.788 | 0.036 | 3.690 | 11.927 | 0.003 | 0.163 | 0.081  | 1.180 |
| cg25106783 | PRR4;TAS2R43;PRH1 | 0.716 | 0.077 | 0.779 | 0.025 | 3.348 | 20.356 | 0.003 | 0.163 | 0.063  | 0.908 |
| cg11752699 | HLA-DRB6          | 0.414 | 0.260 | 0.233 | 0.053 | 3.219 | 28.625 | 0.003 | 0.164 | -0.181 | 0.773 |
| cg16514085 | HLA-DRB1          | 0.384 | 0.352 | 0.668 | 0.399 | 4.060 | 8.519  | 0.003 | 0.164 | 0.436  | 0.819 |
| cg21457401 | PNLDC1            | 0.444 | 0.065 | 0.391 | 0.021 | 3.321 | 21.307 | 0.003 | 0.164 | -0.053 | 0.889 |
| cg00236261 | CCDC3             | 0.883 | 0.103 | 0.954 | 0.021 | 3.208 | 28.722 | 0.003 | 0.165 | 0.071  | 0.767 |
| cg21698879 | HLA-DRB5          | 0.830 | 0.112 | 0.919 | 0.035 | 3.308 | 21.747 | 0.003 | 0.165 | 0.089  | 0.880 |
| cg06679334 |                   | 0.449 | 0.071 | 0.381 | 0.030 | 3.502 | 14.792 | 0.003 | 0.165 | -0.068 | 1.042 |
| cg04566512 |                   | 0.829 | 0.064 | 0.747 | 0.037 | 3.924 | 9.316  | 0.003 | 0.165 | -0.082 | 1.389 |
| cg23318020 |                   | 0.384 | 0.109 | 0.302 | 0.030 | 3.256 | 24.491 | 0.003 | 0.165 | -0.082 | 0.836 |
| cg17416722 | HLA-DRB1          | 0.201 | 0.230 | 0.055 | 0.008 | 3.238 | 25.290 | 0.003 | 0.166 | -0.147 | 0.709 |
| cg00440797 | HLA-DRB5          | 0.247 | 0.225 | 0.099 | 0.030 | 3.202 | 28.362 | 0.003 | 0.166 | -0.148 | 0.731 |
| cg27639721 | ATHL1             | 0.269 | 0.070 | 0.196 | 0.033 | 3.618 | 12.466 | 0.003 | 0.166 | -0.073 | 1.139 |
| cg11620135 | BAIAP2            | 0.825 | 0.176 | 0.937 | 0.010 | 3.228 | 25.790 | 0.003 | 0.167 | 0.112  | 0.711 |
| cg24506197 | PTPRN2            | 0.379 | 0.066 | 0.435 | 0.023 | 3.333 | 19.492 | 0.003 | 0.167 | 0.055  | 0.915 |
| cg07668501 |                   | 0.228 | 0.080 | 0.134 | 0.043 | 3.796 | 10.165 | 0.003 | 0.167 | -0.095 | 1.293 |
| cg23352245 |                   | 0.903 | 0.127 | 0.984 | 0.005 | 3.228 | 25.346 | 0.003 | 0.168 | 0.081  | 0.707 |
| cg23170091 | MUC4              | 0.681 | 0.083 | 0.758 | 0.034 | 3.446 | 15.521 | 0.003 | 0.168 | 0.077  | 1.010 |

|            |                      |       |       |       |       |       |        |       |       |        |       |
|------------|----------------------|-------|-------|-------|-------|-------|--------|-------|-------|--------|-------|
| cg10104420 | HLA-DRB6             | 0.790 | 0.134 | 0.877 | 0.017 | 3.189 | 28.084 | 0.003 | 0.169 | 0.087  | 0.724 |
| cg16268937 |                      | 0.683 | 0.340 | 0.898 | 0.008 | 3.213 | 25.157 | 0.004 | 0.173 | 0.214  | 0.703 |
| cg24947637 |                      | 0.784 | 0.188 | 0.912 | 0.037 | 3.170 | 28.817 | 0.004 | 0.173 | 0.128  | 0.755 |
| cg03466717 | ZNF423               | 0.643 | 0.075 | 0.696 | 0.018 | 3.179 | 27.129 | 0.004 | 0.176 | 0.053  | 0.787 |
| cg17597639 | SDHAP3               | 0.134 | 0.072 | 0.089 | 0.004 | 3.190 | 25.819 | 0.004 | 0.177 | -0.045 | 0.702 |
| cg01682111 | UNKL                 | 0.403 | 0.078 | 0.332 | 0.031 | 3.390 | 15.694 | 0.004 | 0.182 | -0.070 | 0.990 |
| cg11821245 | LDHC                 | 0.621 | 0.236 | 0.770 | 0.019 | 3.164 | 26.491 | 0.004 | 0.183 | 0.149  | 0.702 |
| cg07414525 | CHL1                 | 0.628 | 0.067 | 0.550 | 0.037 | 3.735 | 10.027 | 0.004 | 0.183 | -0.078 | 1.279 |
| cg00935504 | HAGH                 | 0.601 | 0.066 | 0.737 | 0.060 | 4.541 | 6.033  | 0.004 | 0.183 | 0.136  | 2.143 |
| cg26655517 |                      | 0.355 | 0.097 | 0.254 | 0.047 | 3.578 | 11.776 | 0.004 | 0.183 | -0.102 | 1.149 |
| cg10947831 |                      | 0.319 | 0.213 | 0.502 | 0.080 | 3.317 | 17.177 | 0.004 | 0.188 | 0.183  | 0.944 |
| cg17201438 | UBE2O                | 0.680 | 0.077 | 0.628 | 0.015 | 3.122 | 28.694 | 0.004 | 0.190 | -0.052 | 0.747 |
| cg13896699 | DNAH5                | 0.670 | 0.155 | 0.794 | 0.053 | 3.243 | 19.789 | 0.004 | 0.191 | 0.125  | 0.886 |
| cg23432430 |                      | 0.786 | 0.245 | 0.939 | 0.016 | 3.136 | 26.014 | 0.004 | 0.195 | 0.153  | 0.692 |
| cg06379361 |                      | 0.098 | 0.128 | 0.018 | 0.007 | 3.133 | 25.815 | 0.004 | 0.197 | -0.080 | 0.690 |
| cg24932660 | CD164L2              | 0.492 | 0.057 | 0.535 | 0.017 | 3.165 | 23.179 | 0.004 | 0.197 | 0.043  | 0.827 |
| cg06307913 | PRDM8                | 0.483 | 0.080 | 0.389 | 0.045 | 3.690 | 9.809  | 0.004 | 0.197 | -0.094 | 1.276 |
| cg01567173 |                      | 0.909 | 0.066 | 0.967 | 0.026 | 3.319 | 16.051 | 0.004 | 0.197 | 0.058  | 0.963 |
| cg02527811 | C2orf54              | 0.748 | 0.176 | 0.857 | 0.016 | 3.111 | 26.853 | 0.004 | 0.198 | 0.110  | 0.693 |
| cg03030267 | GNASAS;MIR298;MIR296 | 0.461 | 0.098 | 0.400 | 0.010 | 3.102 | 27.086 | 0.004 | 0.198 | -0.061 | 0.693 |
| cg25170017 | EHD1                 | 0.325 | 0.086 | 0.262 | 0.024 | 3.134 | 24.501 | 0.004 | 0.198 | -0.063 | 0.805 |
| cg04523090 |                      | 0.676 | 0.083 | 0.590 | 0.041 | 3.515 | 11.633 | 0.004 | 0.198 | -0.086 | 1.134 |
| cg06373870 | PRDM8                | 0.542 | 0.075 | 0.439 | 0.049 | 3.884 | 8.178  | 0.004 | 0.198 | -0.103 | 1.470 |
| cg11438287 | COL4A2               | 0.779 | 0.179 | 0.213 | 0.242 | 4.981 | 4.882  | 0.004 | 0.198 | -0.566 | 3.096 |
