# Supplementary material for: Differential genome-wide DNA methylation patterns in childhood obesity
Source: PubMed Central journal article supplement (PMC6434834; doi:10.1186/s13104-019-4189-0), 2019-03-25
Supplement: 13104_2019_4189_MOESM2_ESM.pdf [file 13104_2019_4189_MOESM2_ESM.pdf]

**Table S2: 52 canonical pathways classified with IPA**

| <b>Ingenuity Canonical Pathways</b>                            | <b>-log(p-value)</b> | <b>Ratio</b> | <b>Genes</b>                       |
|----------------------------------------------------------------|----------------------|--------------|------------------------------------|
| 1 Antigen Presentation Pathway                                 | 7.5E00               | 1.35E-01     | NLRC5,HLA-DRB1,HLA-B,TAP1,HLA-DRB5 |
| 2 Graft-versus-Host Disease Signaling                          | 3.64E00              | 6.25E-02     | HLA-DRB1,HLA-B,HLA-DRB5            |
| 3 Autoimmune Thyroid Disease Signaling                         | 3.61E00              | 6.12E-02     | HLA-DRB1,HLA-B,HLA-DRB5            |
| 4 Cdc42 Signaling                                              | 3.1E00               | 2.4E-02      | HLA-DRB1,HLA-B,IQGAP1,HLA-DRB5     |
| 5 Allograft Rejection Signaling                                | 2.89E00              | 3.49E-02     | HLA-DRB1,HLA-B,HLA-DRB5            |
| 6 Crosstalk between Dendritic Cells and Natural Killer Cells   | 2.85E00              | 3.37E-02     | HLA-DRB1,HLA-B,HLA-DRB5            |
| 7 OX40 Signaling Pathway                                       | 2.85E00              | 3.37E-02     | HLA-DRB1,HLA-B,HLA-DRB5            |
| 8 Communication between Innate and Adaptive Immune Cells       | 2.82E00              | 3.3E-02      | HLA-DRB1,HLA-B,HLA-DRB5            |
| 9 Type I Diabetes Mellitus Signaling                           | 2.59E00              | 2.73E-02     | HLA-DRB1,HLA-B,HLA-DRB5            |
| 10 B Cell Development                                          | 2.49E00              | 5.88E-02     | HLA-DRB1,HLA-DRB5                  |
| 11 Nur77 Signaling in T Lymphocytes                            | 2.05E00              | 3.51E-02     | HLA-DRB1,HLA-DRB5                  |
| 12 Catecholamine Biosynthesis                                  | 2E00                 | 2.5E-01      | DBH                                |
| 13 Biotin-carboxyl Carrier Protein Assembly                    | 2E00                 | 2.5E-01      | HLCS                               |
| 14 Dendritic Cell Maturation                                   | 2E00                 | 1.68E-02     | HLA-DRB1,HLA-B,HLA-DRB5            |
| 15 Calcium-induced T Lymphocyte Apoptosis                      | 1.96E00              | 3.12E-02     | HLA-DRB1,HLA-DRB5                  |
| 16 CMP-N-acetylneuraminat Biosynthesis I (Eukaryotes)          | 1.91E00              | 2E-01        | GNE                                |
| 17 Hepatic Fibrosis / Hepatic Stellate Cell Activation         | 1.89E00              | 1.52E-02     | COL4A1,COL4A2,COL9A2               |
| 18 T Helper Cell Differentiation                               | 1.87E00              | 2.82E-02     | HLA-DRB1,HLA-DRB5                  |
| 19 IL-4 Signaling                                              | 1.81E00              | 2.63E-02     | HLA-DRB1,HLA-DRB5                  |
| 20 Altered T Cell and B Cell Signaling in Rheumatoid Arthritis | 1.69E00              | 2.27E-02     | HLA-DRB1,HLA-DRB5                  |
| 21 iCOS-iCOSL Signaling in T Helper Cells                      | 1.53E00              | 1.85E-02     | HLA-DRB1,HLA-DRB5                  |
| 22 CD28 Signaling in T Helper Cells                            | 1.46E00              | 1.69E-02     | HLA-DRB1,HLA-DRB5                  |
| 23 PKCθ Signaling in T Lymphocytes                             | 1.46E00              | 1.69E-02     | HLA-DRB1,HLA-DRB5                  |
| 24 Role of NFAT in Regulation of the Immune Response           | 1.17E00              | 1.17E-02     | HLA-DRB1,HLA-DRB5                  |
| 25 Glutathione-mediated Detoxification                         | 1.14E00              | 3.33E-02     | GSTM5                              |
| 26 NRF2-mediated Oxidative Stress Response                     | 1.13E00              | 1.11E-02     | GSTM5,ENC1                         |
| 27 Cytotoxic T Lymphocyte-mediated Apoptosis of Target Cells   | 1.12E00              | 3.12E-02     | HLA-B                              |
| 28 Oncostatin M Signaling                                      | 1.09E00              | 2.94E-02     | MT2A                               |
| 29 Interferon Signaling                                        | 1.09E00              | 2.94E-02     | TAP1                               |
| 30 Notch Signaling                                             | 1.04E00              | 2.63E-02     | DTX1                               |
| 31 Neuroprotective Role of THOP1 in Alzheimer's Disease        | 1.02E00              | 2.5E-02      | HLA-B                              |
| 32 Primary Immunodeficiency Signaling                          | 9.15E-01             | 1.92E-02     | TAP1                               |
| 33 Protein Ubiquitination Pathway                              | 8.78E-01             | 7.84E-03     | HLA-B,TAP1                         |
| 34 Pyridoxal 5'-phosphate Salvage Pathway                      | 8.31E-01             | 1.56E-02     | PDXK                               |
| 35 Remodeling of Epithelial Adherens Junctions                 | 8.07E-01             | 1.47E-02     | IQGAP1                             |
| 36 PEDF Signaling                                              | 7.89E-01             | 1.41E-02     | ARHGAP22                           |
| 37 Caveolar-mediated Endocytosis Signaling                     | 7.84E-01             | 1.39E-02     | HLA-B                              |
| 38 TREM1 Signaling                                             | 7.68E-01             | 1.33E-02     | NLRC5                              |
| 39 CTLA4 Signaling in Cytotoxic T Lymphocytes                  | 7.05E-01             | 1.14E-02     | HLA-B                              |
| 40 Virus Entry via Endocytic Pathways                          | 7.01E-01             | 1.12E-02     | HLA-B                              |
| 41 Rac Signaling                                               | 6.41E-01             | 9.62E-03     | IQGAP1                             |
| 42 Gas Signaling                                               | 6.23E-01             | 9.17E-03     | HCAR3                              |
| 43 Aryl Hydrocarbon Receptor Signaling                         | 5.3E-01              | 7.14E-03     | GSTM5                              |
| 44 Epithelial Adherens Junction Signaling                      | 5.15E-01             | 6.85E-03     | IQGAP1                             |
| 45 Germ Cell-Sertoli Cell Junction Signaling                   | 4.82E-01             | 6.25E-03     | IQGAP1                             |
| 46 IL-8 Signaling                                              | 4.35E-01             | 5.46E-03     | IQGAP1                             |
| 47 Actin Cytoskeleton Signaling                                | 3.77E-01             | 4.61E-03     | IQGAP1                             |
| 48 LPS/IL-1 Mediated Inhibition of RXR Function                | 3.74E-01             | 4.57E-03     | GSTM5                              |
| 49 cAMP-mediated signaling                                     | 3.74E-01             | 4.57E-03     | HCAR3                              |
| 50 Systemic Lupus Erythematosus Signaling                      | 3.73E-01             | 4.55E-03     | HLA-B                              |
| 51 Signaling by Rho Family GTPases                             | 3.53E-01             | 4.27E-03     | IQGAP1                             |
| 52 G-Protein Coupled Receptor Signaling                        | 3.25E-01             | 3.91E-03     | HCAR3                              |
| 53 Xenobiotic Metabolism Signaling                             | 3.07E-01             | 3.69E-03     | GSTM5                              |
